# Supplementary material for: Anisotropic initial reaction mechanism and sensitivity characterization of the host–guest structure CL-20/H2O2 under shock loading
Source: Royal Society of Chemistry journal article supplement (doi:10.1039/d4cp04681a), 2025-01-01
Supplement: d4cp04681a1.pdf [file d4cp04681a1.pdf]

## **Supplementary Information**

### **Anisotropic Initial reaction Mechanism and Sensitivity Characterization of the Host-Guest Structure CL-20/H<sub>2</sub>O<sub>2</sub> under Shock Loading**

*Yu Sha<sup>†</sup>, Xiaobing Zhang<sup>†\*</sup>*

<sup>†</sup> School of Energy and Power Engineering, Nanjing University of Science and  
Technology, Nanjing 210094, China

\* Corresponding author email : zhangxb680504@163.com

**Table S1** Bond order cutoff value for various atom pairs

|   | C    | H    | O    | N    |
|---|------|------|------|------|
| C | 0.55 | 0.40 | 0.65 | 0.30 |
| H | 0.40 | 0.55 | 0.40 | 0.55 |
| O | 0.65 | 0.40 | 0.65 | 0.55 |
| N | 0.30 | 0.55 | 0.55 | 0.45 |

**Table S2** Main reaction paths and relevant information of the CL-20/H<sub>2</sub>O<sub>2</sub> system under the shock velocity of 7 km/s along a-axis in the first 10ps

| Reaction_time/ps | Net flux <sup>a</sup> | Frequencies <sup>b</sup> | Reactions                                                                                                                                                                                       |
|------------------|-----------------------|--------------------------|-------------------------------------------------------------------------------------------------------------------------------------------------------------------------------------------------|
| 3.0~9.93         | 5                     | 25/-20                   | C <sub>12</sub> H <sub>12</sub> N <sub>24</sub> O <sub>24</sub> → C <sub>12</sub> H <sub>12</sub> N <sub>24</sub> O <sub>24</sub>                                                               |
| 2.65~9.98        | 7                     | 76/-69                   | C <sub>6</sub> H <sub>6</sub> N <sub>12</sub> O <sub>12</sub> + C <sub>6</sub> H <sub>6</sub> N <sub>12</sub> O <sub>12</sub> → C <sub>12</sub> H <sub>12</sub> N <sub>24</sub> O <sub>24</sub> |
| 2.91~9.02        | 9                     | 15/-6                    | C <sub>6</sub> H <sub>6</sub> N <sub>12</sub> O <sub>12</sub> + C <sub>6</sub> H <sub>6</sub> N <sub>12</sub> O <sub>12</sub> → C <sub>12</sub> H <sub>12</sub> N <sub>24</sub> O <sub>24</sub> |
| 5.2~8.85         | 7                     | 9/-2                     | C <sub>6</sub> H <sub>6</sub> N <sub>12</sub> O <sub>12</sub> + C <sub>6</sub> H <sub>6</sub> N <sub>12</sub> O <sub>12</sub> → C <sub>12</sub> H <sub>12</sub> N <sub>24</sub> O <sub>24</sub> |
| 1.5~10.0         | 9                     | 649/-640                 | C <sub>6</sub> H <sub>6</sub> N <sub>12</sub> O <sub>12</sub> → C <sub>6</sub> H <sub>6</sub> N <sub>12</sub> O <sub>12</sub>                                                                   |
| 0.9~10.0         | 10                    | 645/-635                 | C <sub>6</sub> H <sub>6</sub> N <sub>12</sub> O <sub>12</sub> → C <sub>6</sub> H <sub>6</sub> N <sub>12</sub> O <sub>12</sub>                                                                   |
| 2.92~10.0        | 12                    | 65/-53                   | C <sub>12</sub> H <sub>12</sub> N <sub>24</sub> O <sub>24</sub> → C <sub>6</sub> H <sub>6</sub> N <sub>12</sub> O <sub>12</sub> + C <sub>6</sub> H <sub>6</sub> N <sub>12</sub> O <sub>12</sub> |

<sup>a</sup>The reactions whose net fluxes below 5 times are excluded from the table.

<sup>b</sup>The frequencies of the forward and inverse reactions are separated with the “/” symbol.

**Table S3** Main reaction paths and relevant information of the CL-20/H<sub>2</sub>O<sub>2</sub> system under the shock velocity of 8 km/s along a-axis in the first 10ps

| Reaction_time/ps | Net flux | Frequencies | Reactions                                                                                                                                                                                       |
|------------------|----------|-------------|-------------------------------------------------------------------------------------------------------------------------------------------------------------------------------------------------|
| 6.75~9.74        | 5        | 7/-2        | C <sub>12</sub> H <sub>13</sub> N <sub>23</sub> O <sub>22</sub> → C <sub>12</sub> H <sub>13</sub> N <sub>23</sub> O <sub>22</sub>                                                               |
| 5.75~7.3         | 6        | 11/-5       | C <sub>18</sub> H <sub>18</sub> N <sub>36</sub> O <sub>33</sub> → C <sub>18</sub> H <sub>18</sub> N <sub>36</sub> O <sub>33</sub>                                                               |
| 6.98~9.68        | 5        | 14/-9       | C <sub>12</sub> H <sub>13</sub> N <sub>23</sub> O <sub>22</sub> → C <sub>12</sub> H <sub>13</sub> N <sub>23</sub> O <sub>22</sub>                                                               |
| 7.87~9.92        | 6        | 15/-9       | C <sub>6</sub> H <sub>6</sub> N <sub>11</sub> O <sub>11</sub> → C <sub>6</sub> H <sub>6</sub> N <sub>11</sub> O <sub>11</sub>                                                                   |
| 1.81~10.0        | 8        | 159/-151    | H <sub>2</sub> O <sub>2</sub> + NO <sub>2</sub> → HNO <sub>3</sub> + HO                                                                                                                         |
| 0.45~10.0        | 14       | 384/-370    | HO + HO → H <sub>2</sub> O <sub>2</sub>                                                                                                                                                         |
| 2.9~9.96         | 6        | 81/-75      | HO + C <sub>6</sub> H <sub>7</sub> N <sub>11</sub> O <sub>11</sub> → H <sub>2</sub> O <sub>2</sub> + C <sub>6</sub> H <sub>6</sub> N <sub>11</sub> O <sub>10</sub>                              |
| 4.63~9.86        | 5        | 9/-4        | C <sub>12</sub> H <sub>12</sub> N <sub>24</sub> O <sub>24</sub> → C <sub>6</sub> H <sub>6</sub> N <sub>12</sub> O <sub>12</sub> + C <sub>6</sub> H <sub>6</sub> N <sub>12</sub> O <sub>12</sub> |
| 4.56~9.94        | 5        | 23/-18      | C <sub>12</sub> H <sub>12</sub> N <sub>24</sub> O <sub>24</sub> → C <sub>12</sub> H <sub>12</sub> N <sub>24</sub> O <sub>24</sub>                                                               |

|           |    |            |                                                                                       |
|-----------|----|------------|---------------------------------------------------------------------------------------|
| 0.72~6.97 | 8  | 20/-12     | $C_{12}H_{12}N_{24}O_{24} \rightarrow C_{12}H_{12}N_{23}O_{22} + NO_2$                |
| 0.87~9.99 | 6  | 119/-113   | $C_{12}H_{12}N_{24}O_{24} \rightarrow C_6H_6N_{12}O_{12} + C_6H_6N_{12}O_{12}$        |
| 0.83~8.75 | 10 | 36/-26     | $C_{12}H_{12}N_{23}O_{22} + NO_2 \rightarrow C_6H_6N_{12}O_{12} + C_6H_6N_{12}O_{12}$ |
| 6.93~9.85 | 7  | 13/-6      | $C_6H_6N_{12}O_{12} \rightarrow C_6H_6N_{12}O_{12}$                                   |
| 3.23~9.94 | 10 | 29/-19     | $C_6H_6N_{12}O_{12} + C_6H_6N_{13}O_{14} \rightarrow C_{12}H_{12}N_{25}O_{26}$        |
| 2.44~8.75 | 5  | 94/-89     | $C_6H_6N_{12}O_{12} + NO_2 \rightarrow C_6H_5N_{12}O_{12} + HNO_2$                    |
| 1.57~9.96 | 9  | 34/-25     | $C_6H_6N_{12}O_{12} + NO_2 \rightarrow C_6H_6N_{13}O_{14}$                            |
| 1.0~10.0  | 5  | 78/-73     | $C_6H_6N_{12}O_{12} \rightarrow C_6H_6N_{11}O_{10} + NO_2$                            |
| 0.71~10.0 | 12 | 358/-346   | $C_6H_6N_{12}O_{12} \rightarrow C_6H_6N_{11}O_{10} + NO_2$                            |
| 0.7~9.99  | 6  | 101/-95    | $C_6H_6N_{12}O_{12} \rightarrow C_6H_6N_{12}O_{12}$                                   |
| 0.4~10.0  | 13 | 1090/-1077 | $C_6H_6N_{12}O_{12} \rightarrow C_6H_6N_{12}O_{12}$                                   |
| 0.44~10.0 | 5  | 329/-324   | $C_6H_6N_{12}O_{12} \rightarrow C_6H_6N_{12}O_{12}$                                   |
| 1.02~9.69 | 6  | 28/-22     | $C_6H_6N_{11}O_{10} + NO_2 \rightarrow C_6H_6N_{12}O_{12}$                            |
| 1.45~9.9  | 5  | 30/-25     | $C_6H_6N_{11}O_{10} + NO_2 \rightarrow C_6H_6N_{12}O_{12}$                            |
| 5.4~9.65  | 11 | 36/-25     | $C_6H_6N_{11}O_{10} + N_2O_5 \rightarrow C_6H_6N_{13}O_{15}$                          |
| 1.02~9.96 | 5  | 28/-23     | $C_6H_7N_{12}O_{13} \rightarrow HO + C_6H_6N_{12}O_{12}$                              |
| 2.65~9.82 | 6  | 15/-9      | $C_6H_6N_{13}O_{14} \rightarrow C_6H_6N_{12}O_{11} + NO_3$                            |
| 3.71~9.9  | 6  | 26/-20     | $C_6H_6N_{13}O_{14} \rightarrow C_6H_6N_{13}O_{14}$                                   |
| 6.25~9.45 | 5  | 7/-2       | $C_6H_6N_{13}O_{15} \rightarrow C_6H_6N_{11}O_{10} + N_2O_5$                          |
| 0.5~9.95  | 5  | 52/-47     | $C_6H_6N_{12}O_{12} \rightarrow C_6H_6N_{12}O_{12}$                                   |
| 0.64~9.75 | 7  | 50/-43     | $C_6H_6N_{12}O_{12} \rightarrow C_6H_6N_{12}O_{12}$                                   |
| 1.84~9.72 | 7  | 15/-8      | $C_6H_6N_{12}O_{12} \rightarrow C_6H_6N_{11}O_{10} + NO_2$                            |
| 0.36~9.99 | 5  | 891/-886   | $C_6H_6N_{12}O_{12} \rightarrow C_6H_6N_{12}O_{12}$                                   |
| 2.34~7.41 | 6  | 7/-1       | $C_{12}H_{12}N_{23}O_{22} \rightarrow C_{12}H_{12}N_{23}O_{22}$                       |
| 0.77~8.58 | 5  | 16/-11     | $C_{12}H_{12}N_{24}O_{24} \rightarrow C_{12}H_{12}N_{24}O_{24}$                       |
| 4.68~8.64 | 7  | 23/-16     | $C_6H_6N_{11}O_{10} \rightarrow C_6H_6N_{11}O_{10}$                                   |

**Table S4** Main reaction paths and relevant information of the CL-20/H<sub>2</sub>O<sub>2</sub> system under the shock velocity of 9 km/s along a-axis in the first 10ps

| Reaction_time/ps | Net flux | Frequencies | Reactions                                                                      |
|------------------|----------|-------------|--------------------------------------------------------------------------------|
| 7.79~9.0         | 8        | 11/-3       | $C_6H_6N_{14}O_{18} + NO_2 \rightarrow C_6H_6N_{13}O_{15} + N_2O_5$            |
| 9.22~9.99        | 5        | 5/0         | $C_6H_6N_{11}O_{10} \rightarrow C_6H_6N_{11}O_{10}$                            |
| 1.25~3.05        | 5        | 8/-3        | $C_6H_6N_{12}O_{12} + C_6H_6N_{11}O_{11} \rightarrow C_{12}H_{12}N_{23}O_{23}$ |
| 2.87~4.28        | 5        | 8/-3        | $C_6H_6N_{12}O_{11} + HO_2 \rightarrow C_6H_7N_{12}O_{13}$                     |

|           |    |          |                                                                                |
|-----------|----|----------|--------------------------------------------------------------------------------|
| 0.6~7.2   | 6  | 28/-22   | $C_6H_6N_{12}O_{11} \rightarrow C_6H_6N_{12}O_{11}$                            |
| 0.96~9.02 | 5  | 17/-12   | $C_6H_6N_{12}O_{11} \rightarrow C_6H_6N_{11}O_9 + NO_2$                        |
| 1.26~5.53 | 5  | 16/-11   | $C_6H_6N_{11}O_{10} \rightarrow C_6H_6N_{11}O_{10}$                            |
| 6.13~9.91 | 5  | 42/-37   | $C_6H_6N_{11}O_7 + HO \rightarrow C_6H_7N_{11}O_8$                             |
| 6.02~6.75 | 5  | 9/-4     | $C_6H_5N_{12}O_{10} + HNO_2 \rightarrow C_6H_6N_{12}O_{10} + NO_2$             |
| 5.68~7.34 | 6  | 8/-2     | $C_6H_6N_{12}O_{12} \rightarrow C_6H_6N_{12}O_{12}$                            |
| 3.68~9.99 | 5  | 116/-111 | $O_2 + NO_2 \rightarrow NO_4$                                                  |
| 0.87~8.2  | 7  | 83/-76   | $H_2O_2 + NO_2 \rightarrow HNO_3 + HO$                                         |
| 0.33~9.99 | 27 | 584/-557 | $H_2O_2 \rightarrow HO + HO$                                                   |
| 5.3~6.78  | 6  | 9/-3     | $C_6H_7N_{12}O_{14} \rightarrow C_6H_7N_{11}O_{11} + NO_3$                     |
| 6.47~8.09 | 6  | 13/-7    | $C_6H_7N_{11}O_{12} \rightarrow C_6H_7N_{11}O_{12}$                            |
| 4.42~5.87 | 5  | 9/-4     | $C_6H_7N_{11}O_{12} + NO_2 \rightarrow C_6H_7N_{12}O_{14}$                     |
| 1.0~9.99  | 15 | 194/-179 | $HO + NO_2 \rightarrow HNO_3$                                                  |
| 0.5~1.31  | 5  | 5/0      | $C_{12}H_{12}N_{24}O_{24} \rightarrow C_{12}H_{12}N_{24}O_{24}$                |
| 3.05~4.2  | 6  | 9/-3     | $C_{12}H_{12}N_{22}O_{20} \rightarrow C_{12}H_{12}N_{22}O_{20}$                |
| 0.39~3.33 | 10 | 32/-22   | $C_6H_6N_{12}O_{12} + C_6H_6N_{12}O_{12} \rightarrow C_{12}H_{12}N_{24}O_{24}$ |
| 0.86~5.89 | 13 | 27/-14   | $C_6H_6N_{12}O_{12} + NO_2 \rightarrow C_6H_6N_{13}O_{14}$                     |
| 0.5~7.48  | 9  | 21/-12   | $C_6H_6N_{12}O_{12} \rightarrow C_6H_6N_{12}O_{12}$                            |
| 0.37~9.91 | 23 | 214/-191 | $C_6H_6N_{12}O_{12} \rightarrow C_6H_6N_{11}O_{10} + NO_2$                     |
| 0.37~9.17 | 11 | 136/-125 | $C_6H_6N_{12}O_{12} \rightarrow C_6H_6N_{11}O_{10} + NO_2$                     |
| 0.3~9.86  | 33 | 417/-384 | $C_6H_6N_{12}O_{12} \rightarrow C_6H_6N_{12}O_{12}$                            |
| 0.29~9.79 | 7  | 344/-337 | $C_6H_6N_{12}O_{12} \rightarrow C_6H_6N_{12}O_{12}$                            |
| 0.31~9.88 | 14 | 198/-184 | $C_6H_6N_{12}O_{12} \rightarrow C_6H_6N_{12}O_{12}$                            |
| 4.92~5.89 | 5  | 8/-3     | $C_6H_6N_{11}O_{10} + NO_3 \rightarrow C_6H_6N_{12}O_{13}$                     |
| 1.33~8.19 | 7  | 13/-6    | $C_6H_6N_{11}O_{10} + NO_2 \rightarrow C_6H_6N_{12}O_{12}$                     |
| 0.45~8.99 | 8  | 88/-80   | $C_6H_6N_{11}O_{10} \rightarrow C_6H_6N_{11}O_{10}$                            |
| 1.34~7.56 | 6  | 21/-15   | $C_6H_6N_{12}O_{12} \rightarrow C_6H_6N_{12}O_{12}$                            |
| 5.28~5.77 | 6  | 6/0      | $C_6H_6N_{11}O_{11} + NO_2 \rightarrow C_6H_6N_{11}O_{10} + NO_3$              |
| 6.02~9.67 | 5  | 12/-7    | $C_6H_7N_{11}O_{12} \rightarrow C_6H_7N_{11}O_{12}$                            |
| 4.01~4.69 | 5  | 8/-3     | $C_{12}H_{12}N_{23}O_{23} \rightarrow C_{12}H_{12}N_{23}O_{23}$                |
| 0.56~7.55 | 5  | 57/-52   | $C_6H_6N_{11}O_{10} \rightarrow C_6H_6N_{11}O_{10}$                            |
| 2.18~9.97 | 16 | 115/-99  | $NO_3 + NO_2 \rightarrow N_2O_5$                                               |
| 0.64~9.94 | 12 | 65/-53   | $NO_2 + NO_2 \rightarrow N_2O_4$                                               |
| 0.44~3.81 | 5  | 22/-17   | $C_6H_6N_{12}O_{13} \rightarrow C_6H_6N_{12}O_{11} + O_2$                      |

|           |   |      |                                                                                |
|-----------|---|------|--------------------------------------------------------------------------------|
| 3.02~4.35 | 5 | 9/-4 | $C_{12}H_{12}N_{25}O_{27} \rightarrow C_6H_6N_{13}O_{14} + C_6H_6N_{12}O_{13}$ |
|-----------|---|------|--------------------------------------------------------------------------------|

**Table S5** Main reaction paths and relevant information of the CL-20/H<sub>2</sub>O<sub>2</sub> system under the shock velocity of 10 km/s along a-axis in the first 2.5ps

| Reaction_time/ps | Net flux | Frequencies | Reactions                                                  |
|------------------|----------|-------------|------------------------------------------------------------|
| 0.72~1.43        | 5        | 5/0         | $C_6H_6N_{12}O_{11} \rightarrow C_6H_6N_{11}O_9 + NO_2$    |
| 0.74~2.5         | 10       | 56/-46      | $O_2 + NO_2 \rightarrow NO_4$                              |
| 0.33~2.35        | 12       | 28/-16      | $H_2O_2 + NO_2 \rightarrow HNO_3 + HO$                     |
| 0.27~2.5         | 22       | 187/-165    | $H_2O_2 \rightarrow HO + HO$                               |
| 0.42~2.44        | 9        | 30/-21      | $HNO_3 \rightarrow HO + NO_2$                              |
| 0.31~1.12        | 8        | 22/-14      | $C_6H_6N_{12}O_{12} \rightarrow C_6H_6N_{11}O_{10} + NO_2$ |
| 0.33~0.99        | 7        | 16/-9       | $C_6H_6N_{12}O_{12} \rightarrow C_6H_6N_{11}O_{10} + NO_2$ |
| 0.28~0.51        | 5        | 6/-1        | $C_6H_6N_{12}O_{12} \rightarrow C_6H_6N_{12}O_{12}$        |
| 0.24~1.03        | 7        | 56/-49      | $C_6H_6N_{12}O_{12} \rightarrow C_6H_6N_{12}O_{12}$        |
| 0.23~1.05        | 18       | 52/-34      | $C_6H_6N_{12}O_{12} \rightarrow C_6H_6N_{12}O_{12}$        |
| 0.27~0.76        | 13       | 29/-16      | $C_6H_6N_{12}O_{12} \rightarrow C_6H_6N_{12}O_{12}$        |
| 1.49~2.49        | 7        | 16/-9       | $NO_3 + NO_2 \rightarrow N_2O_5$                           |
| 0.86~2.4         | 5        | 19/-14      | $NO_5 \rightarrow NO_5$                                    |
